# Supplementary material for: Air Annealing Process for Threshold Voltage Tuning of MoTe2 FET
Source: MDPI journal article supplement (doi:10.3390/app12083840), 2022-04-11
Supplement: s1 [file s1]

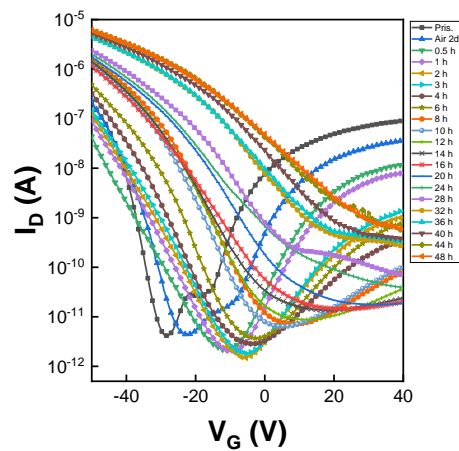

Figure S1. Transfer curves of MoTe<sub>2</sub> Device #1

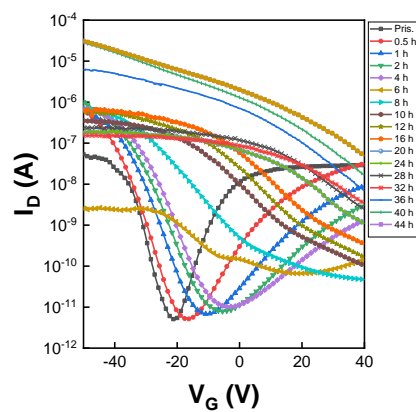

Figure S2. Transfer curves of MoTe<sub>2</sub> Device #2

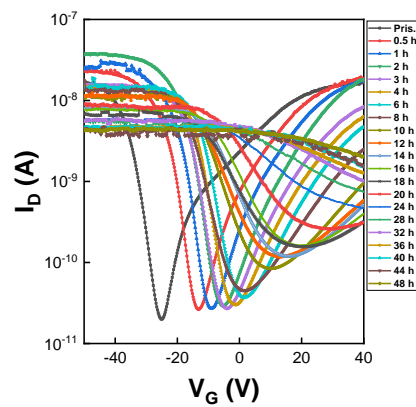

Figure S3. Transfer curves of MoTe<sub>2</sub> Device #3

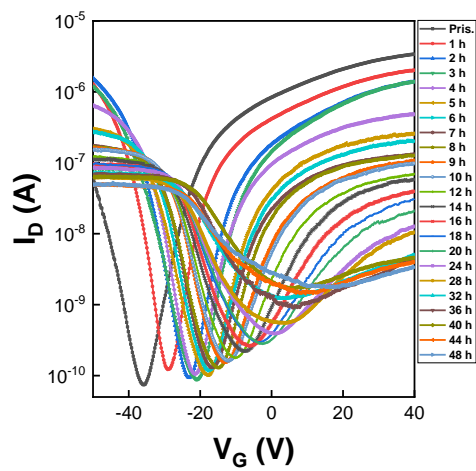

**Figure S4.** Transfer curves of MoTe<sub>2</sub> Device #4

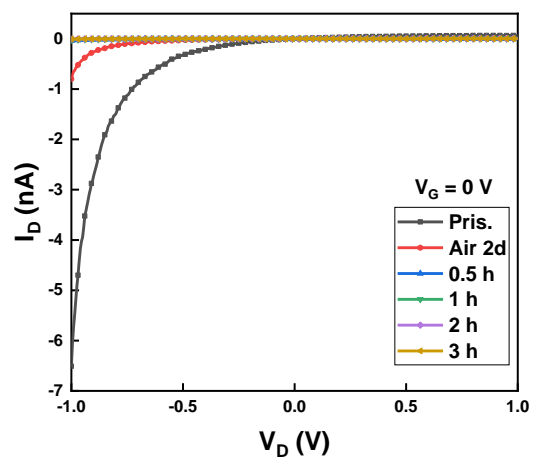

**Figure S5.** Output curves ( $I_{ds}$ - $V_{ds}$ ) of Device #1 under zero gate bias

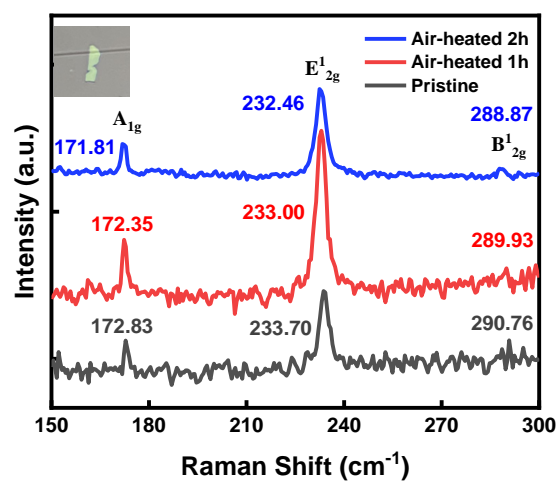

Figure S6. Raman spectra of air-heated MoTe<sub>2</sub> Device #2

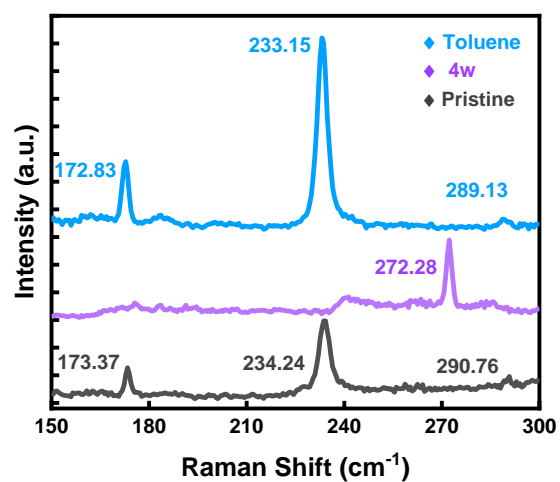

Figure S7. Raman spectra of toluene treated, air-exposed MoTe<sub>2</sub> flake

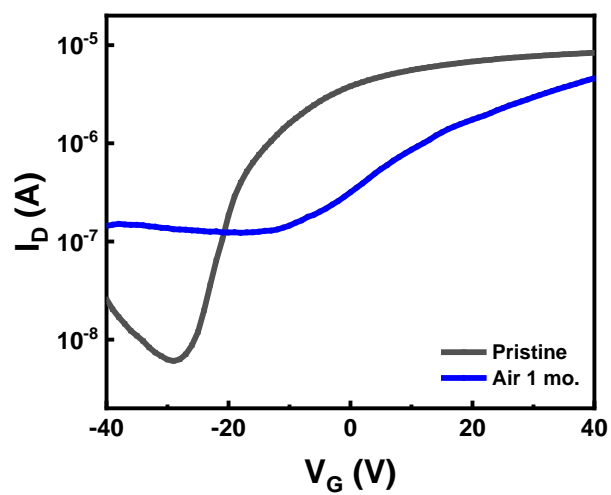

**Figure S8.** Transfer Characteristics curves of as-fabricated (dark grey) and air-exposed for 1-month (blue) MoTe<sub>2</sub> FET

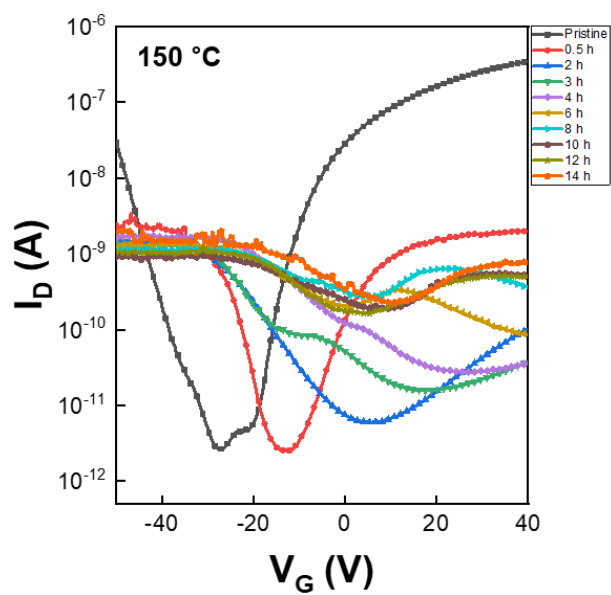

**Figure S9.** Transfer Characteristics curves of MoTe<sub>2</sub> FET air heated at 150 °C

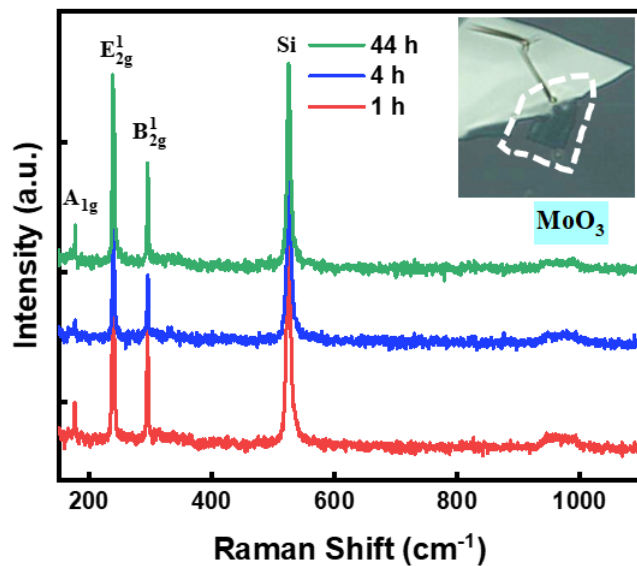

**Figure S10.** Raman Spectra of air heated MoTe<sub>2</sub> flake over a range 150 – 1100 cm<sup>-1</sup> (inset: optic image)

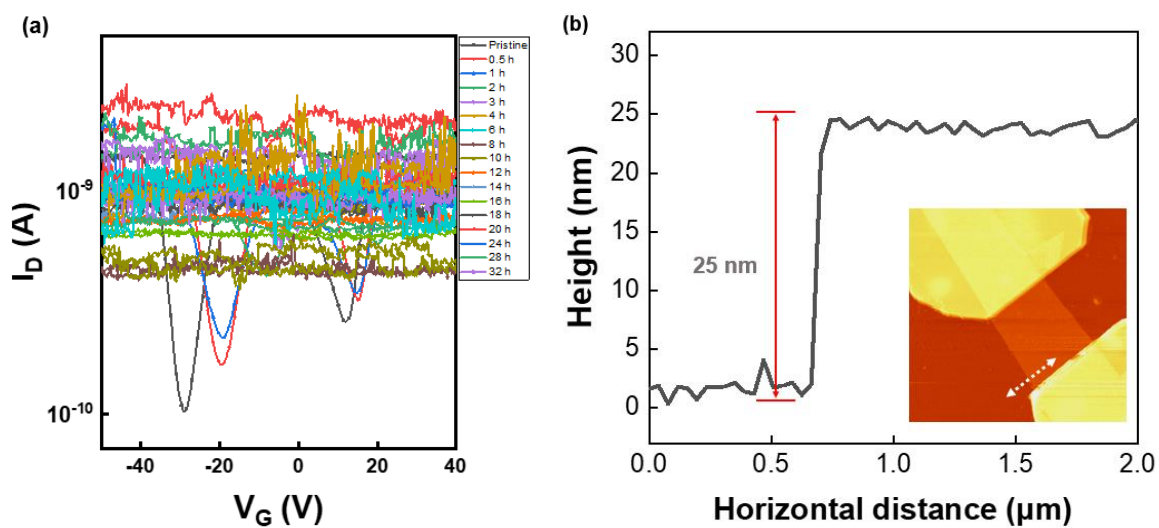

**Figure S11.** (a) Transfer curves and (b) AFM height profile (inset: AFM image) of MoTe<sub>2</sub> FET #5
